# Supplementary material
Source: publisher figshare collection journal article supplement (https://tandf.figshare.com/articles/dataset/_/2868064)
Supplement: Supplementary file 1 [file 2]

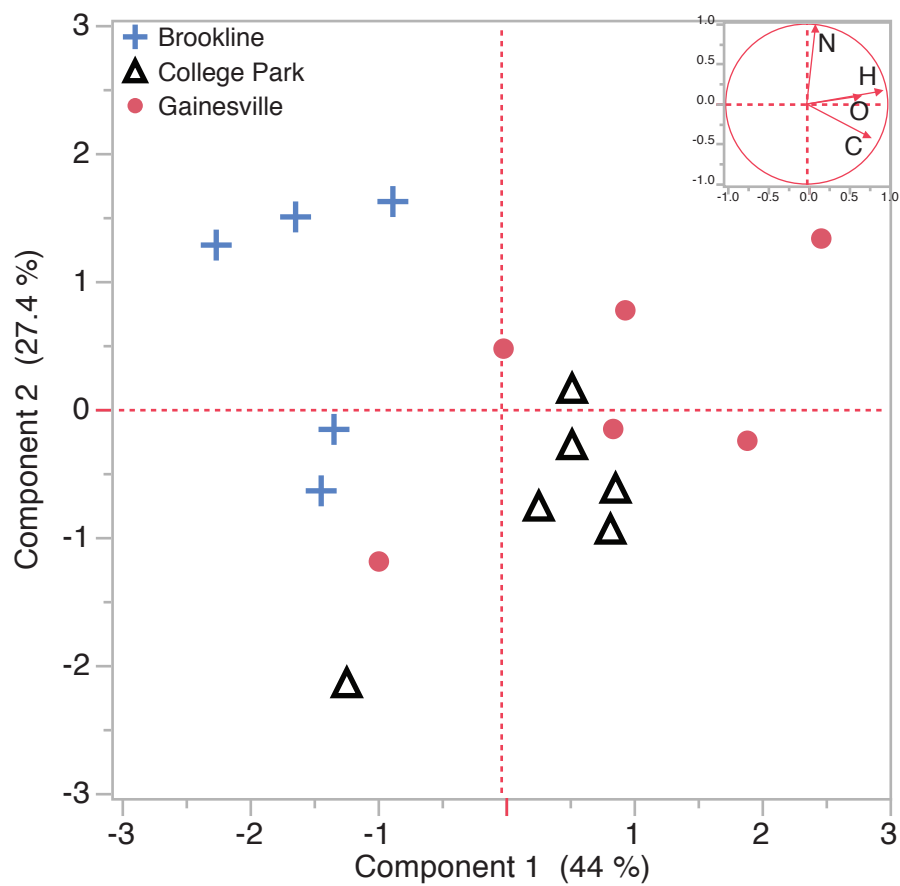

Supplementary Figure 1.

Principal components analysis of  $\delta^{18}\text{O}$ ,  $\delta^2\text{H}$ ,  $\delta^{15}\text{N}$ , and  $\delta^{13}\text{C}$  for hair samples from Brookline (+), College Park ( $\Delta$ ), and Gainesville ( $\bullet$ ).
